# Supplementary material for: Facile preparation of a lightweight multifunctional interlayer for high-performance Li–S batteries
Source: Royal Society of Chemistry journal article supplement (doi:10.1039/d3dt03895e), 2024-01-01
Supplement: d3dt03895e1.pdf [file d3dt03895e1.pdf]

## Supplementary Information

### **Facile preparation of a lightweight multifunctional interlayer for high performance Li-S battery**

Yuan Lei<sup>a,#</sup>, Zhenyu Zhang<sup>a,#</sup>, Zhan Lin<sup>a</sup>, Samiran Bhattacharjee<sup>b</sup>, Chao Chen<sup>a,\*</sup>

<sup>a</sup> School of Chemical Engineering and Light Industry, Guangdong University of Technology, Guangzhou 510006, China.

<sup>b</sup> Centre for Advanced Research in Sciences (CARS), University of Dhaka, Dhaka 1000, Bangladesh.

# These authors contribute equally to this work.

\* Corresponding author, E-mail: [c.chen@gdut.edu.cn](mailto:c.chen@gdut.edu.cn)

## **Experimental section**

### *Preparation of the NC/G composite*

In a typical synthesis, 0.631 g melamine and 1.0405 g terephthalaldehyde was dissolved in 31 ml dimethyl sulfoxide. 0.2 g graphene oxide (GO) was then added to the above solution, which was stirred and refluxed at 180 °C under N<sub>2</sub> atmosphere for 3 days. After cooling to the room temperature, the solid product was collected by filtration, washed with excessive acetone, dried in oven, and finally carbonized at 800 °C in N<sub>2</sub> atmosphere for 1 hour to obtain the nitrogen-abundant carbon/graphene composite (NC/G). For comparison, NC was also prepared using the same procedure, except GO was not introduced into the reaction system.

### *Preparation of NC/G-modified separator*

NC/G was dispersed in 50 ml ethanol by ultrasonication for 0.5 hour to form a uniform slurry. Vacuum filtration was conducted to uniformly coat a NC/G layer onto the pristine PP separator. Different loading amount of the NC/G material on the pristine separator, i.e., 0.24, 0.12, 0.08 mg cm<sup>-2</sup>, was prepared, respectively.

### *Lithium polysulfides adsorption and diffusion tests*

Li<sub>2</sub>S<sub>6</sub> was selected as the representative of lithium polysulfides for the adsorption and diffusion tests. In the glove box, sublimated sulfur (1.6 g) and Li<sub>2</sub>S (0.46 g) were mixed in 50 ml DOL/DME solution (volume ratio of 1:1), which was stirred vigorously at 70 °C for 12 hours to obtain a uniform Li<sub>2</sub>S<sub>6</sub> solution (0.2 M). The Li<sub>2</sub>S<sub>6</sub> solution was then diluted to 2 mM using DOL/DME solution for the adsorption and diffusion tests. The lithium polysulfides adsorption test was conducted as follows: 20 mg NC/G was immersed in 60 μL 2 mM Li<sub>2</sub>S<sub>6</sub> solution for 0.5 hour, and the color change of the solution was recorded by camera. The Li<sub>2</sub>S<sub>6</sub> solution before and after NC/G treatment were suffered for UV-vis spectroscopy analysis. For the lithium polysulfides diffusion test, the penetration of Li<sub>2</sub>S<sub>6</sub> through the separator with or without NC/G interlayer was tested using an H-shaped device containing 2 mM brownish Li<sub>2</sub>S<sub>6</sub> solution (left) and transparent DOL/DME solution (right). The color change of the DOL/DME solution was recorded by camera at different time intervals, i.e., 0, 2, 8, and 24 hours, respectively.

### *Cells assembly and electrochemical measurements*

Carbon nanotube (CNT) was used as the sulfur scaffold for the cathode. CNT and sulfur were mixed at a mass ratio of 2:8 for 0.5 hours, and the mixture was treated at 155

°C under argon atmosphere for 12 hours. Then, the CNT@S composite, super P, and PVDF were mixed in NMP solvent at a weight ratio of 7:2:1. After stirring for 12 hours, the slurry was coated on aluminum foil, which was vacuum dried at 60 °C overnight, and cut into circular pieces with a diameter of 14 mm. The sulfur loading is controlled at 1.2 mg cm<sup>-2</sup>. Coin cell (CR2032) was assembled in an argon-filled glove box using lithium foil as the anode. 1 M LiTFSI in a DME/DOL (1:1 v/v) with 1 wt. % LiNO<sub>3</sub> solvent was used as the electrolyte. The electrolyte to sulfur ratio (E/S) was controlled at 15 μL mg<sup>-1</sup> S. The charge discharge test was carried out on LAND multichannel battery testing system with a voltage window of 1.7-2.8 V. The cyclic voltammetry (CV) and electrochemical impedance spectroscopy (EIS) was measured by CHI760e electrochemical working station in the voltage range of 1.7-2.8 V.

### *Material characterization*

The matter phase is analyzed by X-ray diffraction (XRD) measurement conducted on the RIGAKU miniflex600x-ray diffractometer (CuK $\alpha$ ,  $\lambda$ = 1.54059 Å). The valence state, chemical bond and binding energy of elements was analyzed by X-ray photoelectron spectroscopy (XPS) measurement carried out on the Thermo Scientific escalab 250xi model X-ray photoelectron spectrometer. Ultraviolet visible spectra (UV-Vis) were obtained by the perseetu-1900 spectrophotometer. The morphology of materials were obtained by Field emission scanning electron microscope (SEM, Hitachi SU8010) and Transmission electron microscope (TEM, JEOL-JEM 2100 f). Pore properties of materials were analyzed through nitrogen adsorption-desorption measurement using Belsorp Mini (II). Thermogravimetric analysis (TGA) was conducted on NETZZCH-TG209f3 to

determine the content of sulfur in the electrode. The content of nitrogen, carbon and oxygen elements were tested by the TC500 inorganic oxygen nitrogen hydrogen tester.

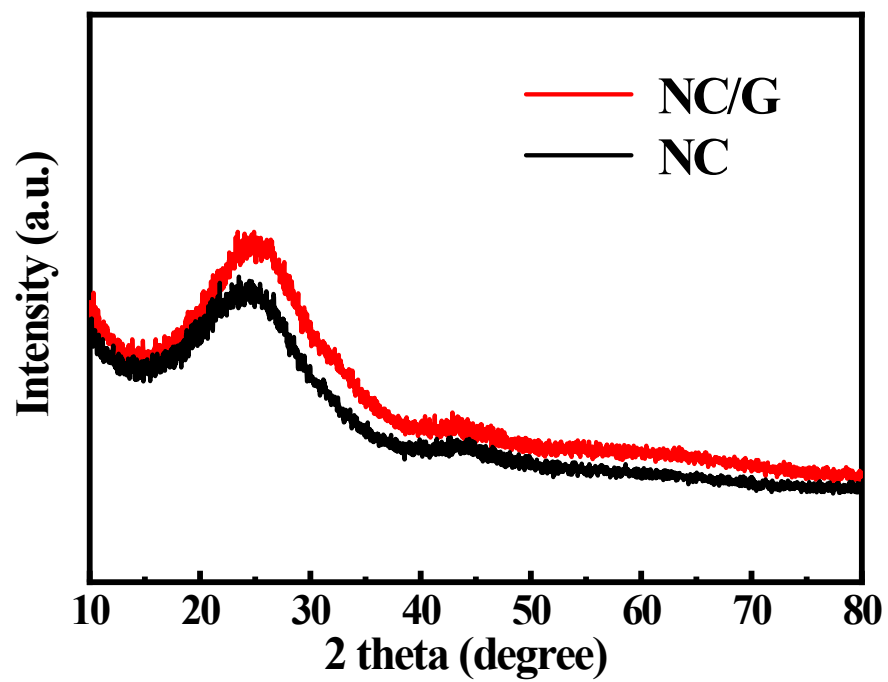

**Fig. S1** X-ray powder diffraction patterns of NC and NC/G.

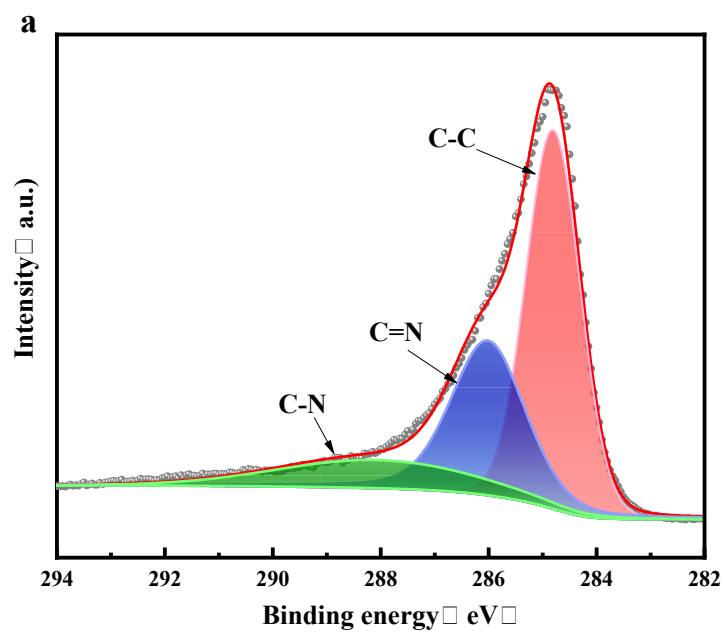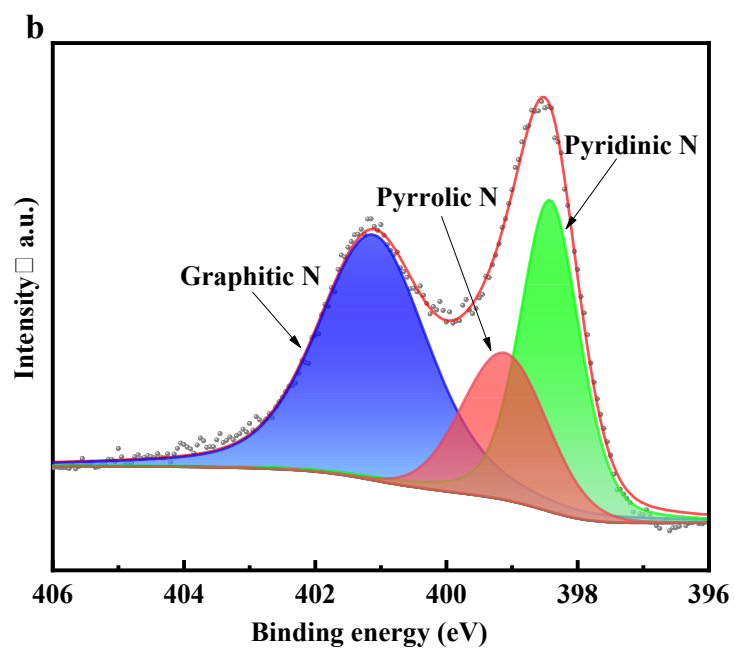

**Fig. S2** (a) High-resolution C 1s and (b) N 1s XPS spectra.

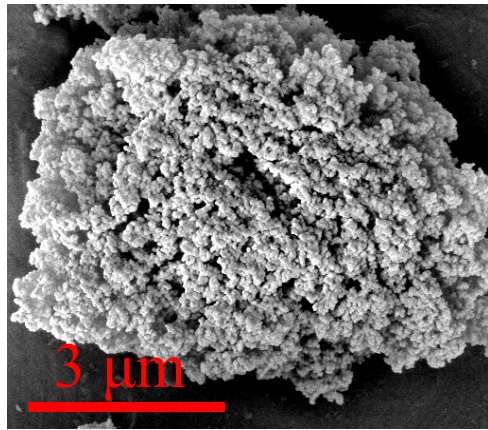

**Fig. S3** SEM image of the NC.

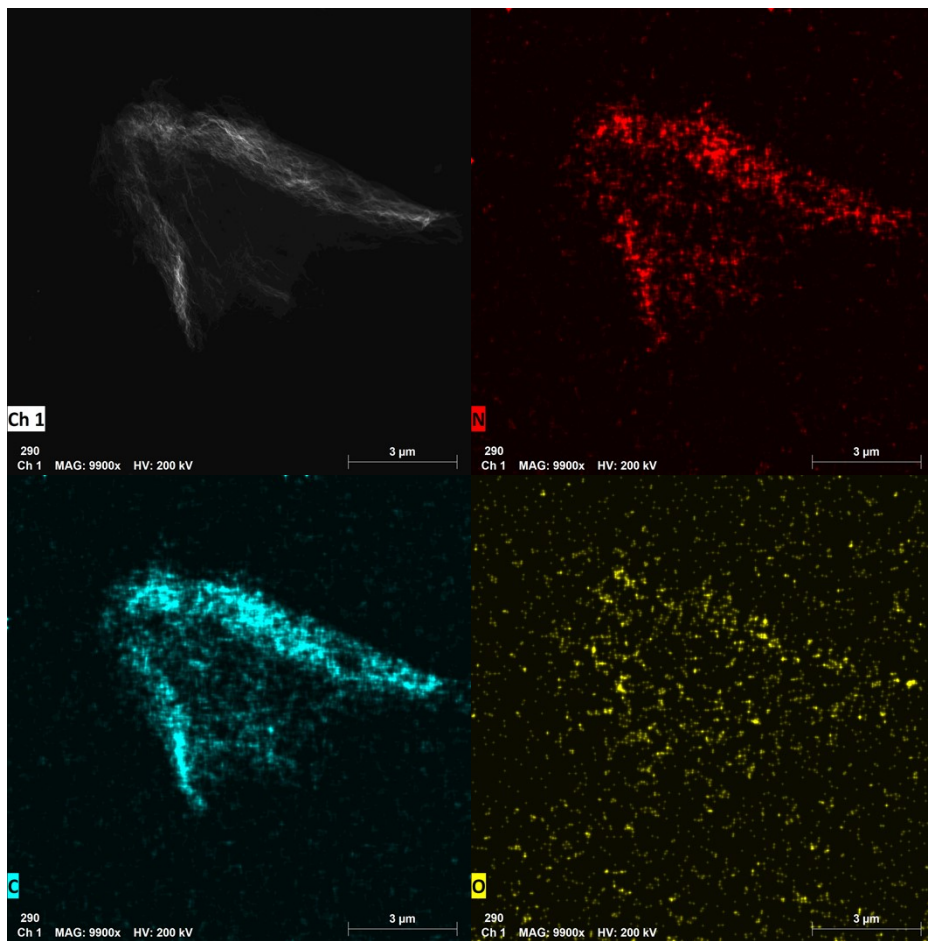

**Fig. S4** TEM image of the NC/G.



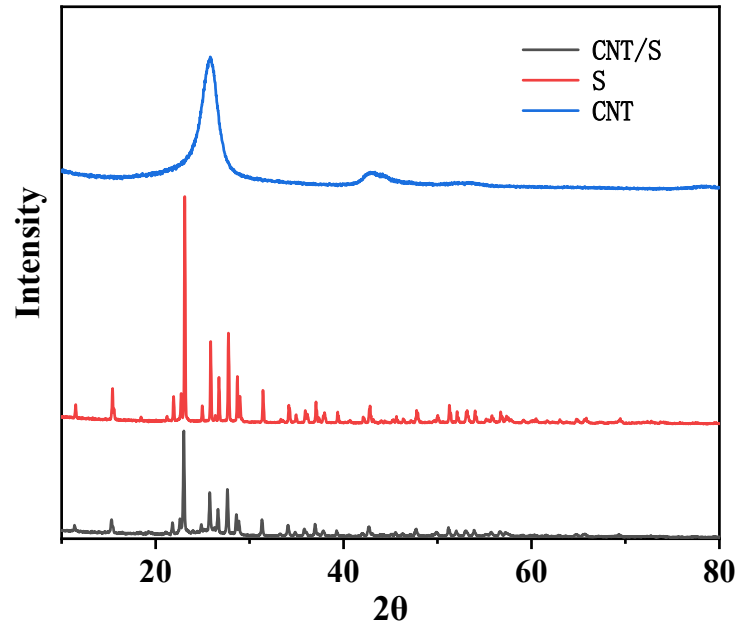

**Fig. S5** X-ray powder diffraction patterns of CNS/S composite and pure materials.

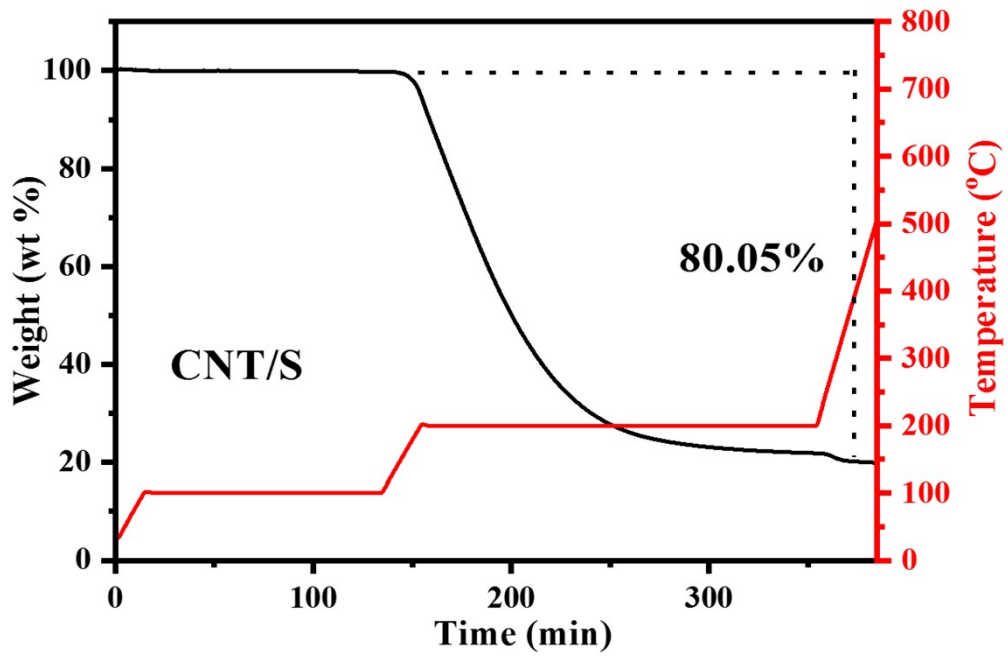

Fig. S6 TGA curves of the S/CNT composite.

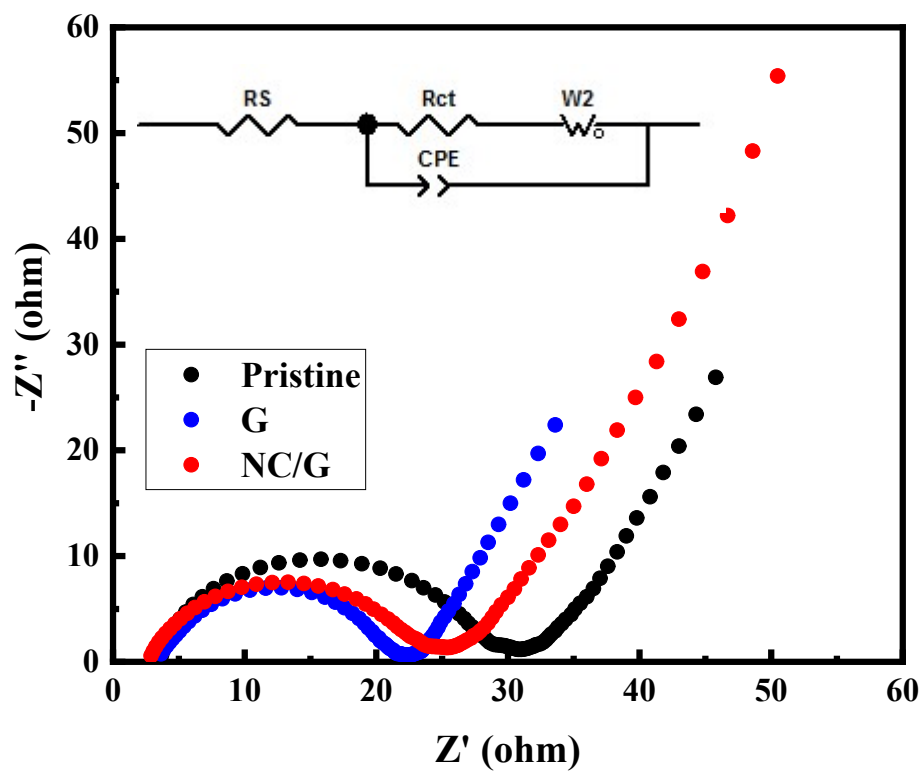

Fig. S7 Nyquist plots of cells assembled with different separators.

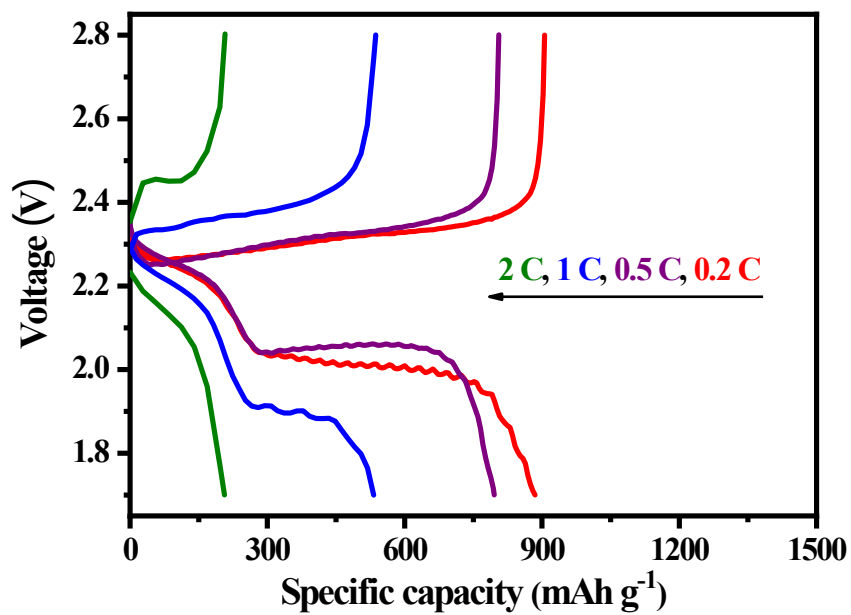

**Fig. S8** Galvanostatic discharge-charge profile of the cell assembled with the pristine separator at different current densities.

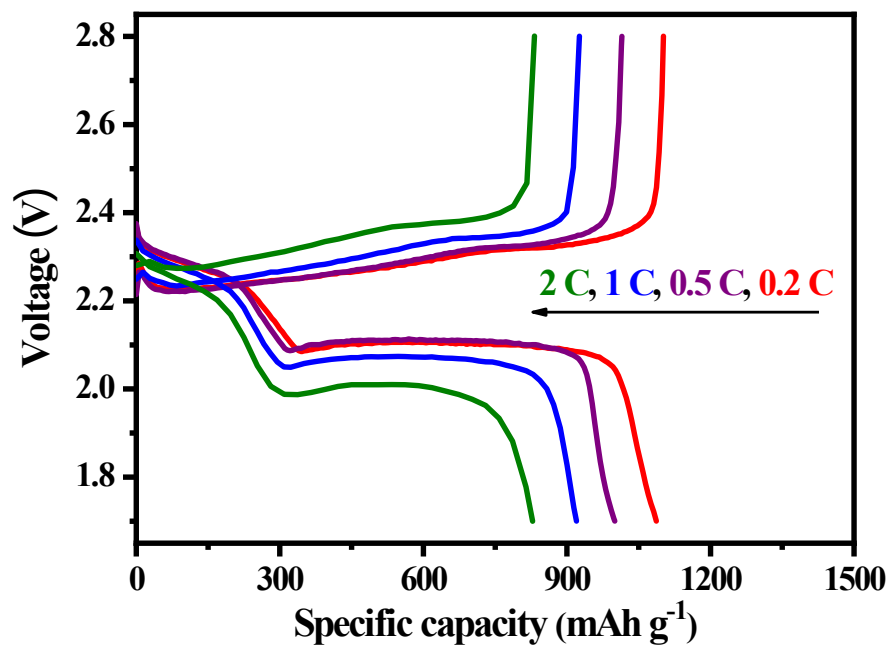

**Fig. S9** Galvanostatic discharge-charge profile of the cell assembled with the G-modified separator at different current densities.

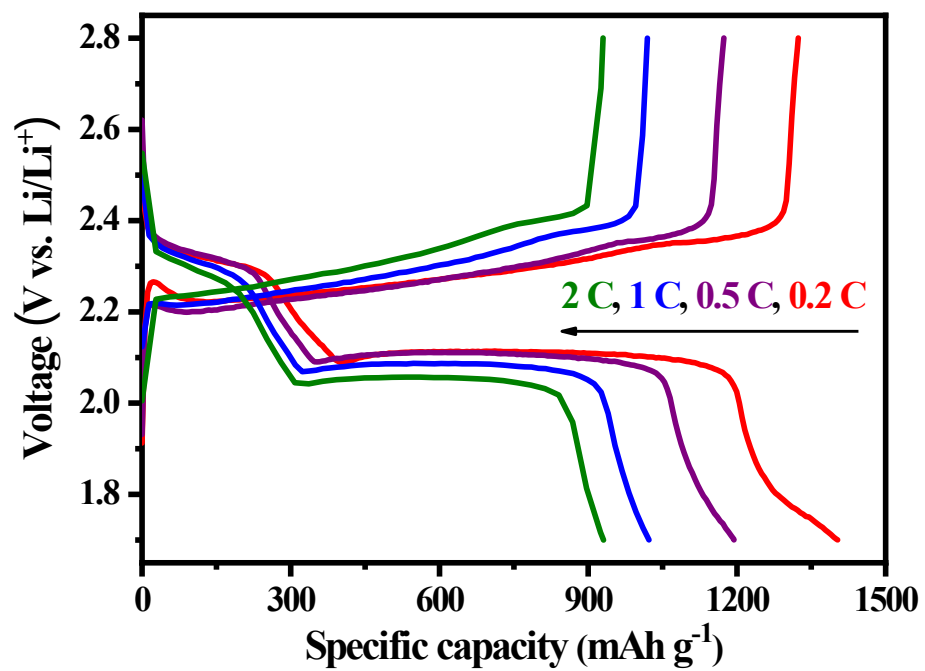

**Fig. S10** Galvanostatic discharge-charge profile of the cell assembled with the NC/G-modified separator at different current densities.

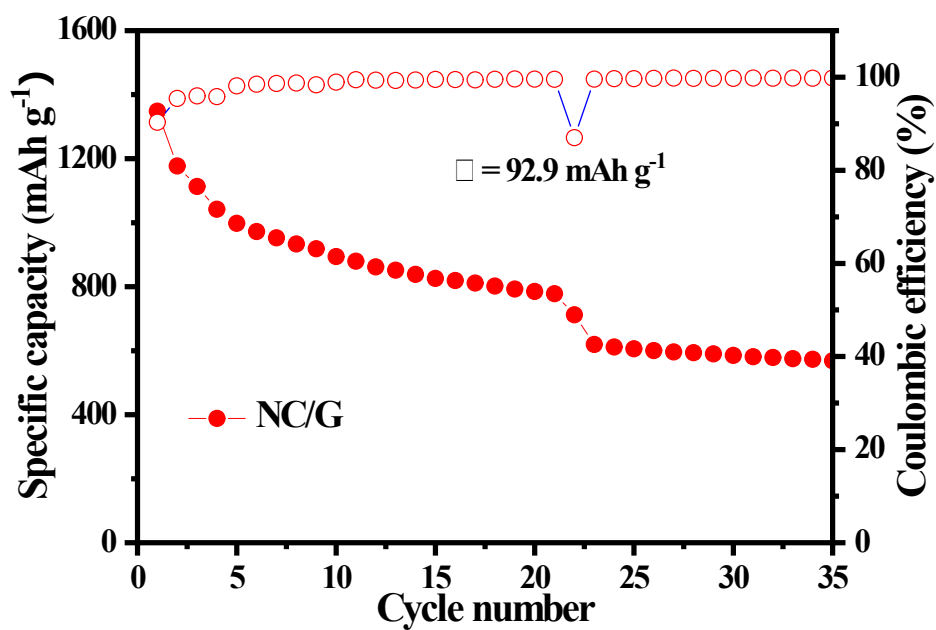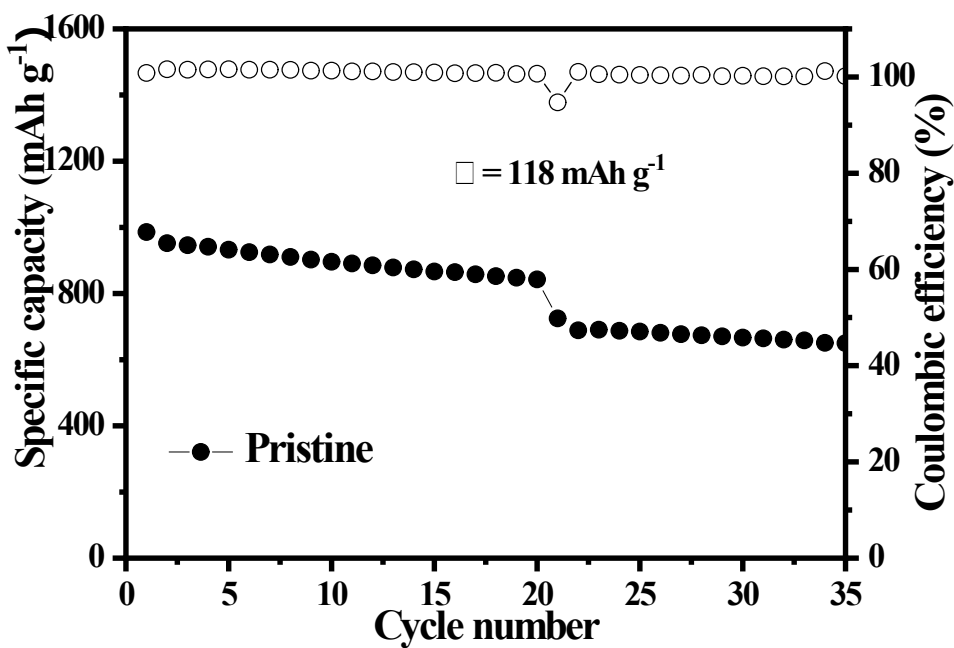

Fig. S11 Cycling performance and capacity decay (5 day rest at 2.1 V during discharge) of batteries with NC/G-modified separator and pristine separator at 0.2 C.

**Table S1. Fitting results from EIS.**

| <b>Separator</b> | <b><math>R_s(\Omega)</math></b> | <b><math>R_{ct}(\Omega)</math></b> |
|------------------|---------------------------------|------------------------------------|
| NC/G             | 2.863                           | 19.47                              |
| G                | 3.697                           | 17.08                              |
| Pristine         | 3.592                           | 24.31                              |

**Table S2. Physical and chemical characteristics of samples.**

| <b>Materials</b> | <b><math>S_{BET}</math><br/>(<math>m^2 g^{-1}</math>)</b> | <b><math>V_{total}</math><br/>(<math>cm^3 g^{-1}</math>)</b> | <b>N Content<br/>(wt.%)</b> |
|------------------|-----------------------------------------------------------|--------------------------------------------------------------|-----------------------------|
| NC/G             | 560                                                       | 0.30                                                         | 16.2                        |
| NC               | 812                                                       | 0.39                                                         | 17.7                        |



**Table S3. Comparison of Li-S battery performance assembled with different interlayers with different loading amount of interlayer material on separators.**

| Interlayer materials                                  | Loading (mg cm <sup>-2</sup> ) | C Rate     | Cycle number | Capacity retention (mAh g <sup>-1</sup> ) | Ref.             |
|-------------------------------------------------------|--------------------------------|------------|--------------|-------------------------------------------|------------------|
| Oxygen-doped carbon/rGO                               | 0.5                            | 0.1        | 200          | 830                                       | [1]              |
| ZnO nanowire/carbon nanofiber                         | 0.7                            | 1          | 200          | 776                                       | [2]              |
| Y-FTZB                                                | 1.2                            | 0.25       | 300          | 557                                       | [3]              |
| HKUST-1@GO                                            | 0.3                            | 0.5        | 500          | 799                                       | [4]              |
| Carbon nanofiber/Gum Arabic                           | 0.25                           | 1          | 250          | 827                                       | [5]              |
| Porous sulfonated carbon                              | 1.2                            | 0.5        | 200          | 776                                       | [6]              |
| Porous-graphene                                       | 0.54                           | 0.5        | 150          | 877                                       | [7]              |
| PC/MWCNT                                              | 0.51                           | 0.5        | 200          | 659                                       | [8]              |
| m-Mn <sub>2</sub> O <sub>3</sub> /SP                  | 0.3-0.4                        | 0.5        | 300          | 553                                       | [9]              |
| P-doped BN/GO                                         | 0.1                            | 0.5        | 500          | 646                                       | [10]             |
| PW <sub>4</sub> /Super P                              | 0.25                           | 0.1        | 70           | 603                                       | [11]             |
| Se <sub>0.06</sub> SPAN/MMT                           | 0.5                            | 0.1        | 300          | 927                                       | [12]             |
| Zn <sub>2</sub> W <sub>2</sub> @2CD                   | 0.28                           | 2          | 200          | 659                                       | [13]             |
| FeNi@NC                                               | 0.54                           | 0.1        | 160          | 836                                       | [14]             |
| SV-VS <sub>2</sub>                                    | 0.5                            | 0.2        | 150          | 921                                       | [15]             |
| UiO-66(SO <sub>3</sub> Li) <sub>4</sub>               | 0.54                           | 0.5        | 300          | 874                                       | [16]             |
| Cu SA/N-Ti <sub>3</sub> C <sub>2</sub> T <sub>x</sub> | 0.34                           | 0.2        | 80           | 1144                                      | [17]             |
| Ni@NGC                                                | 0.1                            | 0.5        | 200          | 773                                       | [18]             |
| NSPCF@CoS <sub>2</sub>                                | 0.98                           | 0.5        | 100          | 665                                       | [19]             |
| NC/G                                                  | <b>0.08</b>                    | <b>0.5</b> | <b>100</b>   | <b>832</b>                                | <b>This work</b> |
|                                                       | <b>0.24</b>                    | <b>0.5</b> | <b>100</b>   | <b>929</b>                                |                  |
|                                                       |                                | <b>1</b>   | <b>300</b>   | <b>761</b>                                |                  |
|                                                       |                                | <b>2</b>   | <b>300</b>   | <b>720</b>                                |                  |

## Reference

1. L. Zhang, F. Wan, X. Wang, H. Cao, X. Dai, Z. Niu, Y. Wang and J. Chen, *ACS Applied Materials & Interfaces*, 2018, **10**, 5594-5602.
2. T. Zhao, Y. Ye, X. Peng, G. Divitini, H.-K. Kim, C.-Y. Lao, P. R. Coxon, K. Xi, Y. Liu, C. Ducati, R. Chen and R. V. Kumar, *Advanced Functional Materials*, 2016, **26**, 8418-8426.
3. M. Li, Y. Wan, J.-K. Huang, A. H. Assen, C.-E. Hsiung, H. Jiang, Y. Han, M. Eddaoudi, Z. Lai, J. Ming and L.-J. Li, *ACS Energy Letters*, 2017, **2**, 2362-2367.
4. S. Bai, X. Liu, K. Zhu, S. Wu and H. Zhou, *Nature Energy*, 2016, **1**, 16094.
5. S. Tu, X. Chen, X. Zhao, M. Cheng, P. Xiong, Y. He, Q. Zhang and Y. Xu, *Advanced Materials*, 2018, **30**, 1804581.
6. P. J. Kim, H. D. Fontecha, K. Kim and V. G. Pol, *ACS Applied Materials & Interfaces*, 2018, **10**, 14827-14834.
7. P.-Y. Zhai, H.-J. Peng, X.-B. Cheng, L. Zhu, J.-Q. Huang, W. Zhu and Q. Zhang, *Energy Storage Materials*, 2017, **7**, 56-63.
8. L. Tan, X. Li, Z. Wang, H. Guo, J. Wang and L. An, *ChemElectroChem*, 2018, **5**, 71-77.
9. S. J. Park, S. Y. Yang, S. A. Han, Y. J. Choi, T. Kim, M.-S. Park, J. H. Kim and K. J. Kim, *Chemical Engineering Journal*, 2023, **460**, 141620.
10. J. Zhang, W. Ma, Z. Feng, F. Wu, D. Wei, B. Xi and S. Xiong, *Journal of Energy Chemistry*, 2019, **39**, 54-60.
11. W. Yao, L. Liu, X. Wu, C. Qin, H. Xie and Z. Su, *ACS Applied Materials & Interfaces*, 2018, **10**, 35911-35918.
12. W. Wang, K. Xi, B. Li, H. Li, S. Liu, J. Wang, H. Zhao, H. Li, A. M. Abdelkader, X. Gao and G. Li, *Advanced Energy Materials*, 2022, **12**, 2200160.
13. L. Ni, J. Gu, X. Jiang, H. Xu, Z. Wu, Y. Wu, Y. Liu, J. Xie, Y. Wei and G. Diao, *Angewandte Chemie International Edition*, 2023, **62**.
14. Y. Luo, D. Zhang, Y. He, W. Zhang, S. Liu, K. Zhu, L. Huang, Y. Yang, G. Wang, R. Yu, H. Shu, X. Wang and M. Chen, *Chemical Engineering Journal*, 2023, **474**, 145751.
15. L. He, X. Zhang, D. Yang, J. Li, M. Wang, S. Liu, J. Qiu, T. Ma, J. Ba, Y. Wang and Y. Wei, *Nano Lett.*, 2023, **23**, 7411-7418.
16. S. Lin, J. Dong, R. Chen, G. Zhang, T. Huang, J. Li, H. Zhou, L.-H. Chung, X. Hu and J. He, *Journal of Alloys and Compounds*, 2023, **965**, 171389.

17. H. Gu, W. Yue, J. Hu, X. Niu, H. Tang, F. Qin, Y. Li, Q. Yan, X. Liu, W. Xu, Z. Sun, Q. Liu, W. Yan, L. Zheng, Y. Wang, H. Wang, X. Li, L. Zhang, G. Xia and W. Chen, *Advanced Energy Materials*, 2023, **13**, 2204014.
18. N. Baikalov, I. Rakhimbek, A. Konarov, A. Mentbayeva, Y. Zhang and Z. Bakenov, *RSC Advances*, 2023, **13**, 9428-9440.
19. N. Wu, J. Wang, C. Liao, L. Han, L. Song, Y. Hu, X. Mu and Y. Kan, *Journal of Energy Chemistry*, 2022, **64**, 372-384.
